# Supplementary material for: Interactions of Human Dermal Dendritic Cells and Langerhans Cells Treated with Hyalomma Tick Saliva with Crimean-Congo Hemorrhagic Fever Virus
Source: PubMed Central journal article supplement (PMC6070959; doi:10.3390/v10070381), 2018-07-20
Supplement: viruses-10-00381-s001.pdf [file viruses-10-00381-s001.pdf]

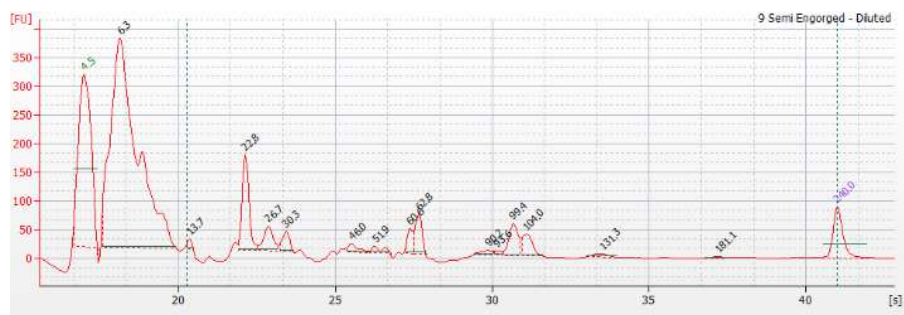

**Supplementary figure 1.** Size and concentrations of protein fractions in *Hyalomma marginatum* salivary extract. SGE was generated from ticks on the second day post attachment. SGE was run on BioAnalyzer using a Agilent Protein 80 Kit.
